# Supplementary material for: Sensitivity of infectious SARS-CoV-2 B.1.1.7 and B.1.351 variants to neutralizing antibodies
Source: Springer Nature journal article supplement (doi:10.1038/s41591-021-01318-5), 2021-03-26
Supplement: 41591_2021_1318_MOESM1_ESM.pdf [file 41591_2021_1318_MOESM1_ESM.pdf]

---

**Supplementary information**

---

**Sensitivity of infectious SARS-CoV-2 B.1.1.7 and B.1.351 variants to neutralizing antibodies**

---

In the format provided by the authors and unedited

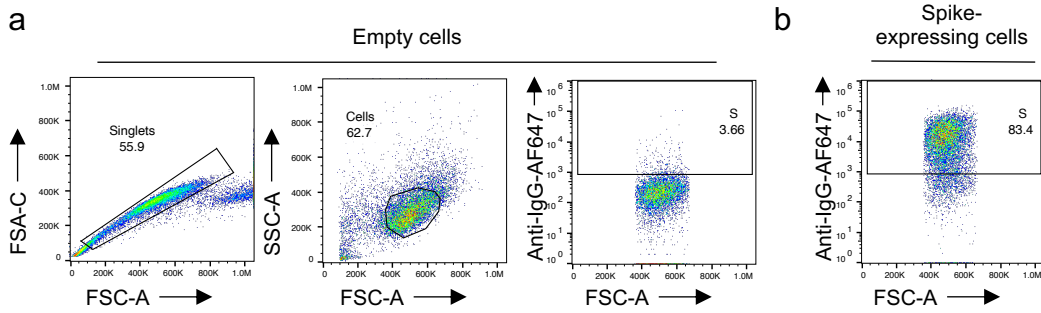

**Fig. S1. Gating strategy of the S-Flow assay**

293T cells were transiently transfected with plasmids expressing the D614G, B.1.1.7 and B.1.351 Spikes. After 24h, cells were stained with anti SARS-CoV-2 antibodies mAb10 (a pan-coronavirus antibody), mAb48, mAb102 or soluble ACE2 (ACE2- biotin at 20  $\mu$ g/ml revealed with fluorescent Streptavidin) and analyzed by flow-cytometry. A. One representative example of the gating strategy is shown. Gates are set on cells transfected with an empty plasmid. b. An example of the signal obtained by a reactive serum on spike expressing cells is shown.

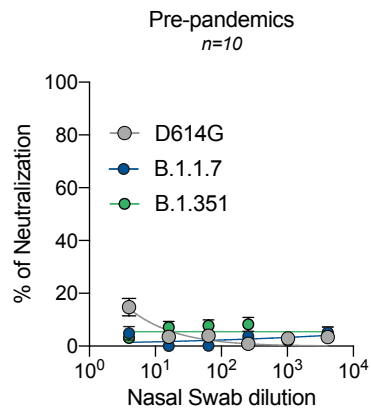

**Fig. S2. Absence of detection of a neutralizing activity in 10 pre-pandemic nasal swabs.** Neutralization curves with nasal swabs from individuals collected in 2018 for Flu-diagnostic purposes. The antiviral activity was measured at the indicated dilutions against D614G, B.1.1.7 and B.1.351 variants. Data are mean  $\pm$  SEM of 10 different samples. One experiment representative of two is shown.

**Table S1a: Orléans Cohort**

|                     |               | total n = 28  |
|---------------------|---------------|---------------|
| sex                 | female        | 17            |
|                     | male          | 11            |
| Age                 |               | 56.9 (46-69)  |
| Severity            | Critical      | 3             |
|                     | Severe        | 13            |
|                     | Mild-Moderate | 11            |
|                     | Asymptomatic  | 1             |
| HIV                 |               | 2             |
| PCR                 |               | 26            |
| Anti-S (S-Flow)     |               | 28            |
| 1st sampling (days) |               | 89 (71-105)   |
| 2nd sampling (days) |               | 177 (164-197) |

**Table S1b: Strasbourg Cohort**

|                 |               | total n = 30  |
|-----------------|---------------|---------------|
| sex             | female        | 27            |
|                 | male          | 3             |
| Age             |               | 44.8 (25-54)  |
| Severity        | Critical      | 0             |
|                 | Severe        | 0             |
|                 | Mild-Moderate | 30            |
|                 | Asymptomatic  | 0             |
| HIV             |               | 0             |
| PCR             |               | 30            |
| Anti-S (S-Flow) |               | 30            |
| Sampling (days) |               | 233 (206-258) |

**Table S2: Orléans Vaccinees**

|                   |                 | total n = 19      |
|-------------------|-----------------|-------------------|
| sex               | female          | 6                 |
|                   | male            | 13                |
| Age               |                 | 55 (46-63)        |
| BMI               |                 | 24.2 (21.9-24.7)  |
| Immune deficiency |                 | 0                 |
| Previous COVID-19 |                 | 3                 |
| Vaccine           | Pfizer-BioNTech | 19                |
|                   | Moderna         | 0                 |
|                   | AstraZeneca     | 0                 |
| 1st shot          |                 | 4-13 january 2021 |
| Sampling          | Week 2          | 17                |
|                   | Week 3          | 18                |
|                   | Week 4          | 11                |
|                   | Week 5          | 16                |
|                   | Week 6          | 15                |
